# Supplementary figures and images for: Extracellular Vesicles Isolation from Large Volume Samples Using a Polydimethylsiloxane-Free Microfluidic Device
Source: MDPI journal article supplement (doi:10.3390/ijms24097971), 2023-04-27

**Figure S1.** Isolated particle size distribution by isolation method per sample.

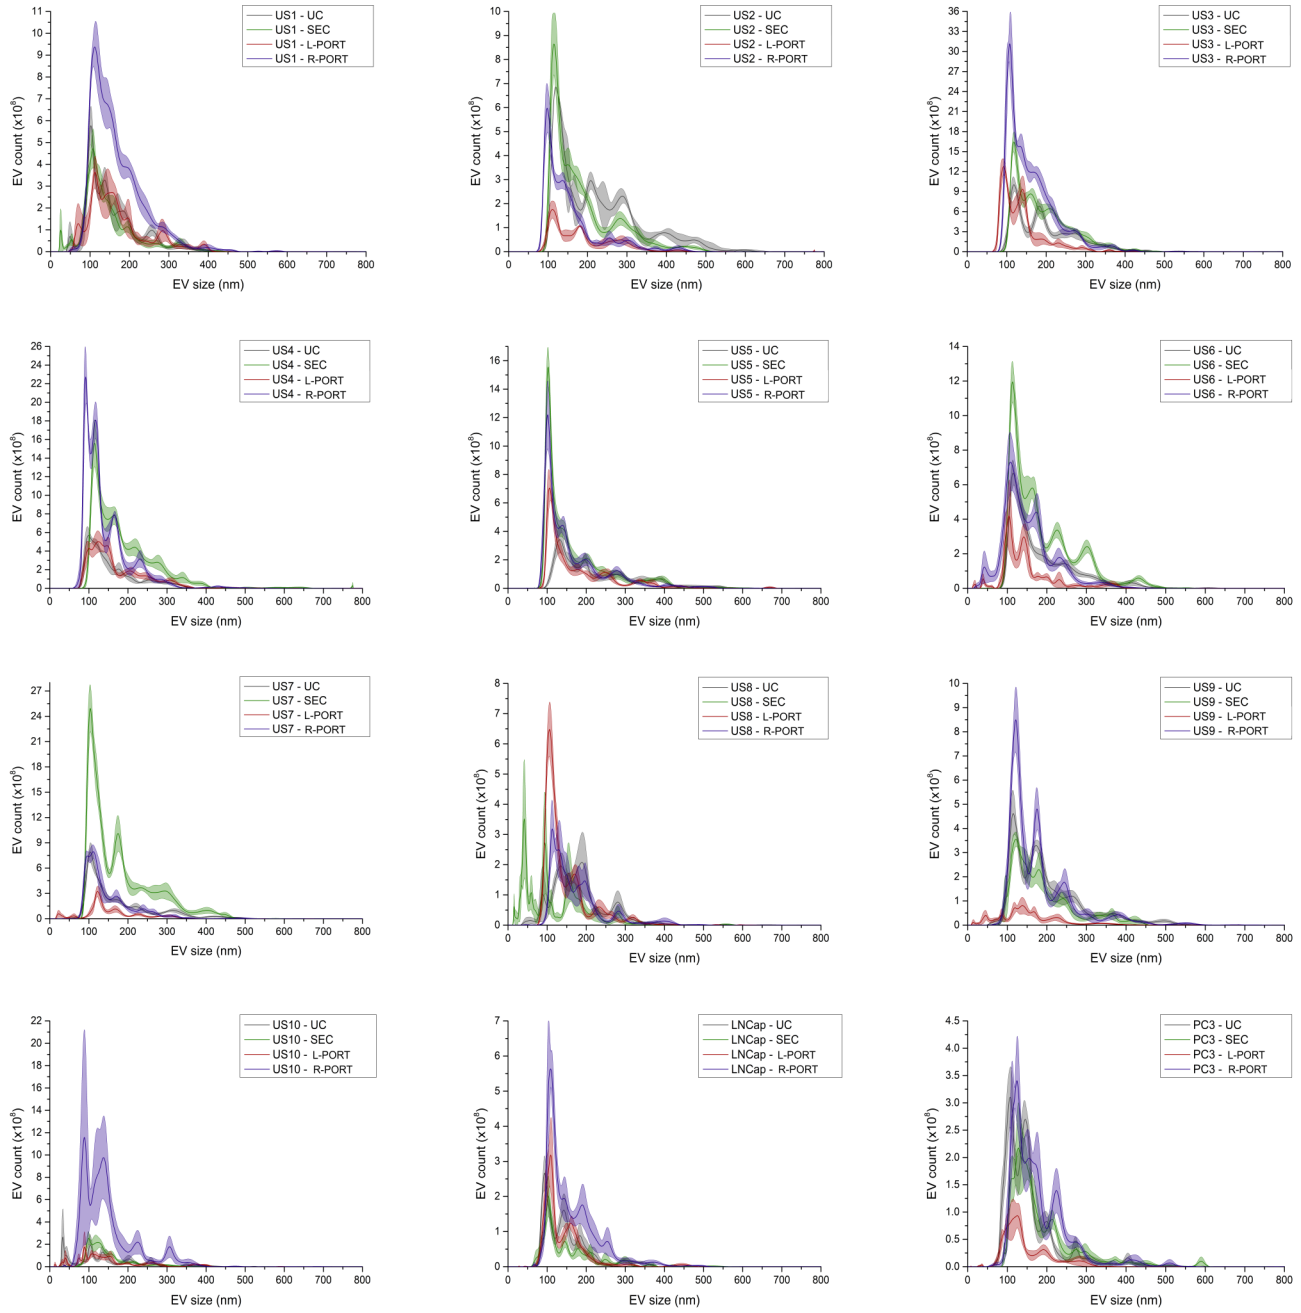

Supplement: s1 [file s1]
